# Supplementary material
Source: PubMed Central journal article supplement (PMC1200272)
Supplement: pnas_0503603102_5.pdf [file pnas_0503603102_5.pdf]

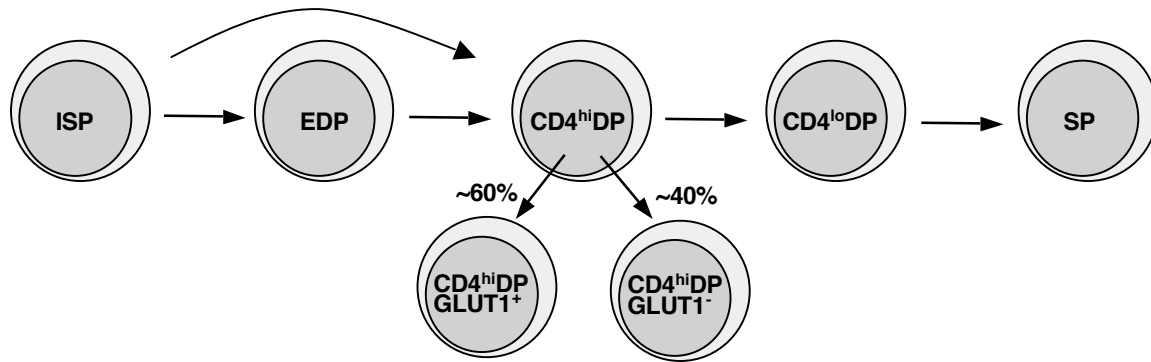

**GLUT1<sup>-/-</sup>**  
**CXCR4<sup>int/hi</sup>**  
**CD71<sup>-/-</sup>**  
**TCR $\alpha\beta$ <sup>-</sup>**  
**CD8 $\alpha$ <sup>-</sup>**  
**CD8 $\beta$ <sup>-</sup>**  
**TCR $\beta$ <sup>+/+</sup>**

**GLUT1<sup>-</sup>**  
  
**CD8 $\alpha$ <sup>+</sup>**  
**CD8 $\beta$ <sup>-</sup>**  
**TCR $\beta$ <sup>-</sup>**

**GLUT1<sup>+</sup>**  
**CXCR4<sup>hi</sup>**  
**CD71<sup>+</sup>**  
**TCR $\alpha\beta$ <sup>lo</sup>**  
**CD8 $\alpha$ <sup>+</sup>**  
**CD8 $\beta$ <sup>+</sup>**  
**TCR $\beta$ <sup>+</sup>**

**GLUT1<sup>-</sup>**  
**CXCR4<sup>int</sup>**  
**CD71<sup>-</sup>**  
**TCR $\alpha\beta$ <sup>int</sup>**  
**CD8 $\alpha$ <sup>+</sup>**  
**CD8 $\beta$ <sup>+</sup>**  
**TCR $\beta$ <sup>+</sup>**

**GLUT1<sup>-</sup>**  
**CXCR4<sup>int</sup>**  
**CD71<sup>-</sup>**  
**TCR $\alpha\beta$ <sup>int</sup>**  
**CD8 $\alpha$ <sup>+</sup>**  
**CD8 $\beta$ <sup>+</sup>**  
**TCR $\beta$ <sup>+</sup>**

**GLUT1<sup>-</sup>**  
**CXCR4<sup>lo</sup>**  
**CD71<sup>-</sup>**  
**TCR $\alpha\beta$ <sup>hi</sup>**  
**CD8 $\alpha$ <sup>+/+</sup>**  
**CD8 $\beta$ <sup>+/+</sup>**  
**TCR $\beta$ <sup>+</sup>**
