# Supplementary material
Source: PubMed Central journal article supplement (PMC1200272)

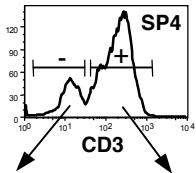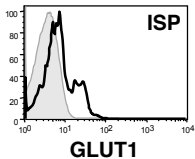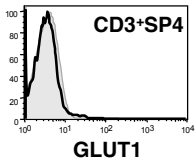

Supplement: pnas_0503603102_1.pdf [file pnas_0503603102_1.pdf]

— CD4<sup>hi</sup>DP  
 — CD4<sup>lo</sup>DP  
 - - - CD3<sup>+</sup>SP4  
 ■ Isotype control

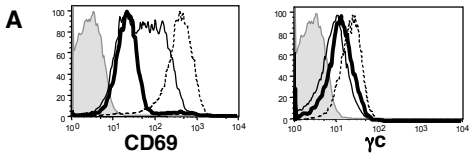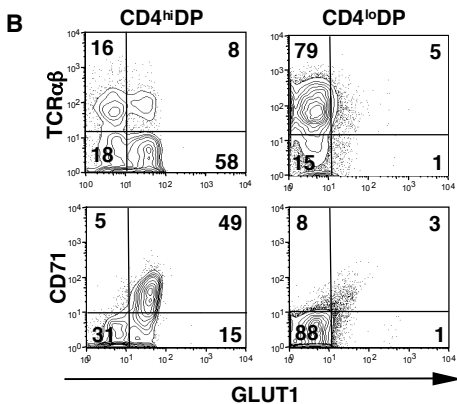

Supplement: pnas_0503603102_2.pdf [file pnas_0503603102_2.pdf]

**GLUT1**

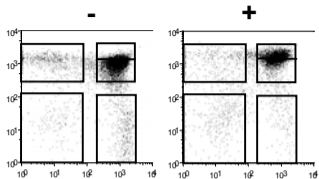

**CXCR4**

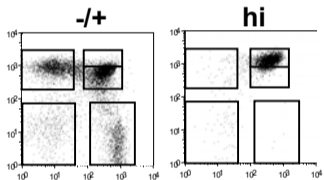

**CD71**

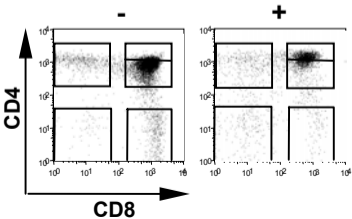

Supplement: pnas_0503603102_3.pdf [file pnas_0503603102_3.pdf]

**CXCL12**

**-**

**+**

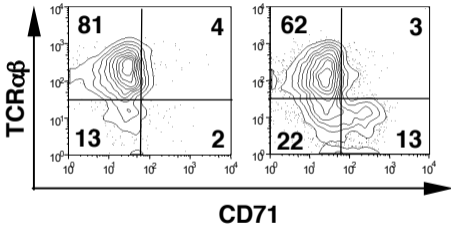

Supplement: pnas_0503603102_4.pdf [file pnas_0503603102_4.pdf]
